# Supplementary material
Source: PubMed Central journal article supplement (PMC1434465)
Supplement: NIHMS9037-supplement-supp2.pdf [file NIHMS9037-supplement-supp2.pdf]

## A Selective, Cell-Permeable Optical Probe for Hydrogen Peroxide in Living Cells

Michelle C. Y. Chang,<sup>†</sup> Arnd Pralle,<sup>‡</sup> Ehud Y. Isacoff,<sup>‡</sup> and Christopher J. Chang<sup>\*,†</sup>

Departments of Chemistry and Molecular and Cell Biology, University of California, Berkeley, California 94720

Received September 24, 2004; E-mail: chrischang@berkeley.edu

Hydrogen peroxide is a major reactive oxygen species (ROS) in living organisms, and its homeostasis can have diverse physiological and pathological consequences.<sup>1</sup> H<sub>2</sub>O<sub>2</sub> is a source of oxidative stress,<sup>2</sup> and oxidative damage resulting from cellular imbalance of H<sub>2</sub>O<sub>2</sub> and other ROS oxidants is connected to aging and severe human diseases such as cancer,<sup>3</sup> cardiovascular disorders,<sup>4</sup> and Alzheimer's and related neurodegenerative diseases.<sup>5</sup> On the other hand, emerging evidence supports a physiological role for H<sub>2</sub>O<sub>2</sub> as a second messenger in cellular signal transduction.<sup>6–8</sup> For example, peroxide bursts trigger mitogen-activated protein (MAP) kinase<sup>9</sup> and nuclear factor  $\kappa$ B (NF- $\kappa$ B)<sup>10</sup> pathways that affect cell proliferation and cell death.

Despite the importance of H<sub>2</sub>O<sub>2</sub> to human health and disease, the molecular mechanisms of its production, accumulation, trafficking, and function are insufficiently understood even in the simplest eukaryotic organisms.<sup>2</sup> We are interested in developing new chemical tools to study the physiological and pathological roles of H<sub>2</sub>O<sub>2</sub> and related ROS in living systems. In this regard, fluorescent probes are well suited to meet the need for reagents to interrogate the cellular chemistry of H<sub>2</sub>O<sub>2</sub> at the molecular level. One major challenge to achieving this goal is creating water-soluble systems that report H<sub>2</sub>O<sub>2</sub> selectively over competing cellular ROS like superoxide (O<sub>2</sub><sup>-</sup>), nitric oxide (NO), and lipid alkylperoxides. Synthetic small molecules offer one approach to such probes, and several types of reagents have been examined for H<sub>2</sub>O<sub>2</sub> detection. Included are dihydro analogues of fluorescent dyes (e.g., 2',7'-dichlorodihydrofluorescein (DCFH), Amplex Red, dihydro-rhodamine 123),<sup>11–13</sup> phosphine-based fluorophores,<sup>14,15</sup> lanthanide coordination complexes,<sup>16</sup> and chromophores with ROS-cleavable protecting groups.<sup>17–19</sup> However, limitations of currently available H<sub>2</sub>O<sub>2</sub>-responsive probes include interfering background fluorescence from other ROS, the need for an external activating enzyme, lack of water solubility or compatibility, and/or excitation profiles in the ultraviolet region, which can damage living samples and cause interfering autofluorescence from native cellular species. The most commonly used fluorophore for cellular ROS detection, DCFH, is also easily autoxidized and exhibits increased background fluorescence upon continued exposure to light.<sup>17</sup> In this report, we present the synthesis and properties of Peroxyfluor-1 (PF1, **2**), a new water-soluble, turn-on optical probe for H<sub>2</sub>O<sub>2</sub> that exhibits high selectivity and dynamic range for this small molecule over other ROS. In addition, we establish its utility for imaging changes in [H<sub>2</sub>O<sub>2</sub>] within living mammalian cells with visible wavelength excitation and emission energies.

Our strategy for the optical detection of H<sub>2</sub>O<sub>2</sub> relies on the selective H<sub>2</sub>O<sub>2</sub>-mediated transformation of arylboronates to phenols.<sup>20</sup> In particular, we reasoned that installation of boronic ester groups at the 3' and 6' positions of a xanthenone scaffold would force this platform to adopt a closed, colorless, and non-fluorescent

### Scheme 1. Synthesis of Peroxyfluor-1 (PF1)

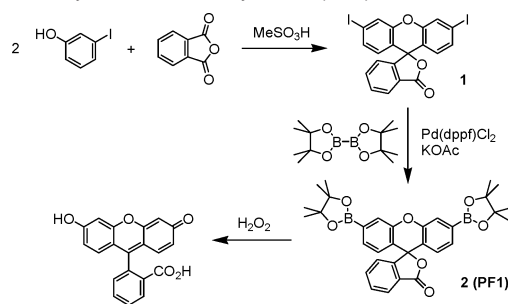

lactone form. Upon treatment with H<sub>2</sub>O<sub>2</sub>, hydrolytic deprotection of the boronates would subsequently generate the open, colored, and fluorescent fluorescein product. Scheme 1 outlines the preparation of PF1 based on this design. Acid-catalyzed condensation of 3-iodophenol and phthalic anhydride affords 3',6'-diiodofluoran **1** in 25% yield.<sup>21</sup> Palladium-catalyzed transmetalation of fluoran **1** under Miyaura conditions<sup>22</sup> with bis(pinacolato)diboron proceeds smoothly to generate PF1 in 50% yield after workup and purification by column chromatography (Supporting Information).

PF1 was evaluated under simulated physiological conditions (20 mM HEPES buffer, pH 7). As expected, the parent compound is non-fluorescent and displays no absorption features in the visible region. The addition of H<sub>2</sub>O<sub>2</sub> triggers a prompt fluorescence increase (Figure 1A) with concomitant growth of a visible wavelength absorption band characteristic of fluorescein. Absorption and emission spectra, along with electrospray ionization mass spectrometry, confirm that fluorescein is the product generated from the reaction between PF1 and H<sub>2</sub>O<sub>2</sub>. The dynamic range of this probe is large owing to its binary absorption/emission response. The fluorescence response of PF1 is also highly H<sub>2</sub>O<sub>2</sub> selective. Figure 1B compares the relative reactivities of PF1 toward various ROS. PF1 exhibits a >500-fold higher response for H<sub>2</sub>O<sub>2</sub> over similar ROS such as *tert*-butyl hydroperoxide (TBHP), O<sub>2</sub><sup>-</sup>, NO, or <sup>-</sup>OCl, which represents a 10- to 100-fold increase in H<sub>2</sub>O<sub>2</sub> selectivity compared to previously reported probes.<sup>11,18,19</sup> The xanthenone probe is also more responsive to H<sub>2</sub>O<sub>2</sub> compared to highly reactive oxygen radicals such as <sup>•</sup>O<sup>-</sup>Bu (>15-fold higher for H<sub>2</sub>O<sub>2</sub>) and <sup>•</sup>OH (>3-fold higher for H<sub>2</sub>O<sub>2</sub>). We suggest that the observed selectivity of PF1 for H<sub>2</sub>O<sub>2</sub> over more oxidizing ROS is based on its detection mechanism, which relies on deprotection rather than oxidation to provide an optical response.<sup>12</sup>

We next assessed the ability of PF1 to operate within living cells. HEK cells were incubated with 5  $\mu$ M PF1 for 5 min at 25 °C and show negligible intracellular background fluorescence (Figure 2A). Prompt increases in cytosolic fluorescence are observed upon addition of physiologically relevant concentrations of exogenous H<sub>2</sub>O<sub>2</sub> (10–100  $\mu$ M, Figure 2B), as determined from scanning confocal microscopy on live samples.<sup>2</sup> Control experiments performed without dye or H<sub>2</sub>O<sub>2</sub> give negligible fluorescence responses,

<sup>†</sup> Department of Chemistry.

<sup>‡</sup> Department of Molecular and Cell Biology.

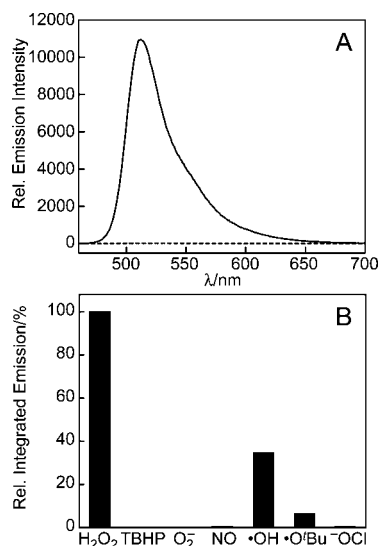

**Figure 1.** (A) Fluorescence response of 5  $\mu\text{M}$  PF1 to 100  $\mu\text{M}$   $\text{H}_2\text{O}_2$ . The dotted and solid line spectra were recorded before and after  $\text{H}_2\text{O}_2$  addition, respectively. Spectra were acquired in 20 mM HEPES, pH 7 ( $\lambda_{\text{exc}} = 450$  nm). (B) Fluorescence responses of 5  $\mu\text{M}$  PF1 to various ROS (10 mM  $\text{O}_2^-$ , 100  $\mu\text{M}$  for all other ROS).  $\cdot\text{OH}$  and  $\cdot\text{O}^t\text{Bu}$  were generated by reaction of  $\text{Fe}^{2+}$  with  $\text{H}_2\text{O}_2$  or *tert*-butyl hydroperoxide (TBHP), respectively. NO was delivered using *S*-nitrosocysteine (SNOC). Spectra were acquired in 20 mM HEPES, pH 7, and all data were obtained after incubation with the appropriate ROS at 25  $^\circ\text{C}$  for 1 h. Collected emission was integrated between 460 and 700 nm ( $\lambda_{\text{exc}} = 450$  nm).

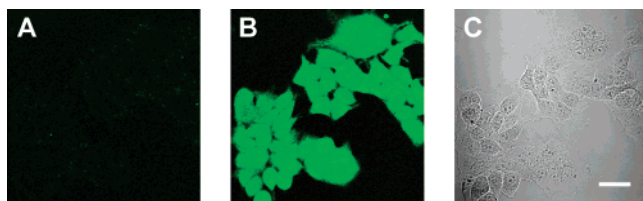

**Figure 2.** Confocal fluorescence and phase contrast images of live HEK cells. (A) Fluorescence image of HEK cells incubated with 5  $\mu\text{M}$  PF1 for 5 min at 25  $^\circ\text{C}$ . (B) Fluorescence image of PF1-stained HEK cells treated with 100  $\mu\text{M}$   $\text{H}_2\text{O}_2$  for 5 min at 25  $^\circ\text{C}$ . (C) Brightfield image of live HEK cells after  $\text{H}_2\text{O}_2$  addition to confirm viability. Scale bar = 30  $\mu\text{m}$ .

and brightfield transmission measurements after PF1 incubation and  $\text{H}_2\text{O}_2$  addition (Figure 2C) confirm that the cells are viable throughout the imaging experiments. These data establish that PF1 is membrane-permeable and can respond to micromolar changes in  $\text{H}_2\text{O}_2$  concentrations within living cells. In addition, subsequent experiments show that fluorescence responds to 100 nM  $\text{H}_2\text{O}_2$  are readily detectable *in vitro*.

To close, we have presented the synthesis, properties, and biological applications of PF1, a new type of probe for optical

imaging of intracellular  $\text{H}_2\text{O}_2$ . This fluorescein-based reagent features excellent selectivity for  $\text{H}_2\text{O}_2$  over competing cellular ROS, a large dynamic response range owing to its dual colorimetric/fluorometric detection mechanism, and long-wavelength visible excitation and emission profiles to minimize cell and tissue damage while avoiding interfering autofluorescence from native cellular species. Furthermore, we have demonstrated the value of this probe by measuring changes in intracellular  $[\text{H}_2\text{O}_2]$  within living mammalian cells. Current efforts are directed toward applying PF1 and related tools for studying the oxidation biology of living systems.

**Acknowledgment.** We thank the University of California, Berkeley, for startup funds and the Camille and Henry Dreyfus Foundation for a New Faculty Award.

**Supporting Information Available:** Synthetic and experimental details. This material is available free of charge via the Internet at <http://pubs.acs.org>.

## References

- Halliwell, B.; Gutteridge, J. M. C. *Free Radicals in Biology and Medicine*, 3rd ed.; Clarendon Press: Oxford, UK, 1999.
- Finkel, T. *Curr. Opin. Cell Biol.* **2003**, *15*, 247–254.
- Ohshima, H.; Tatemichi, M.; Sawa, T. *Arch. Biochem. Biophys.* **2003**, *417*, 3–11.
- Shah, A. M.; Channon, K. M. *Heart* **2004**, *90*, 486–487.
- Barnham, K. J.; Masters, C. L.; Bush, A. I. *Nat. Rev. Drug Discovery* **2004**, *3*, 205–214.
- Wood, Z. A.; Poole, L. B.; Karplus, P. A. *Science* **2003**, *300*, 650–653.
- Woo, H. A.; Chae, H. Z.; Hwang, S. C.; Yang, K.-S.; Kang, S. W.; Kim, K.; Rhee, S. G. *Science* **2003**, *300*, 653–656.
- Budanov, A. V.; Slabina, A. A.; Feinstein, E.; Koonin, E. V.; Chumakov, P. M. *Science* **2004**, *304*, 596–600.
- Guyton, K. Z.; Liu, Y.; Gorospe, M.; Xu, Q.; Holbrook, N. J. *J. Biol. Chem.* **1996**, *271*, 4138–4142.
- Schmidt, K. N.; Amstad, P.; Cerutti, P.; Baeuerle, P. A. *Chem. Biol.* **1995**, *2*, 13–22.
- Negre-Salvayre, A.; Augé, N.; Duval, C.; Robbesyn, F.; Thiers, J.-C.; Nazzari, D.; Benoist, H.; Salvayre, R. *Methods Enzymol.* **2002**, *352*, 62–71.
- Hempel, S. L.; Buettner, G. R.; O'Malley, Y. Q.; Wessels, D. A.; Flaherty, D. M. *Free Rad. Biol. Med.* **1999**, *27*, 146–159.
- Haugland, R. P. *Handbook of Fluorescent Probes and Research Products*, 9th ed.; Molecular Probes: Eugene, OR, 2002.
- Akasaka, K.; Suzuki, T.; Ohnishi, H.; Meguro, H. *Anal. Lett.* **1987**, *20*, 731–745.
- Onoda, M.; Uchiyama, S.; Endo, A.; Tokuyama, H.; Santa, T.; Imai, K. *Org. Lett.* **2003**, *5*, 1459–1461.
- Wolfbeis, O. S.; Dürkop, A.; Wu, M.; Lin, Z. *Angew. Chem., Int. Ed.* **2002**, *41*, 4495–4498.
- Setsukinai, K.; Urano, Y.; Kakinuma, K.; Majima, H. J.; Nagano, T. *J. Biol. Chem.* **2003**, *278*, 3170–3175.
- Lo, L.-C.; Chu, C.-Y. *Chem. Commun.* **2003**, 2728–2729.
- Maeda, H.; Fukuyasu, Y.; Yoshida, S.; Fukuda, M.; Saeki, K.; Matsuno, H.; Yamauchi, Y.; Yoshida, K.; Hirata, K.; Miyamoto, K. *Angew. Chem., Int. Ed.* **2004**, *43*, 2389–2391.
- Kuivila, H. G.; Armour, A. G. *J. Am. Chem. Soc.* **1957**, *79*, 5659–5662.
- The corresponding 3',6'-difluoro-, 3',6'-dichloro-, and 3',6'-dibromofluoran analogues have been reported previously: Gronowska, J.; Dabkowska-Naskret, H. *Pol. J. Chem.* **1981**, *55*, 2151–2163.
- Ishiyama, T.; Murata, M.; Miyaura, N. *J. Org. Chem.* **1995**, *60*, 7508–7510.

JA0441716
